# Supplementary material for: Associations of ficolins and mannose-binding lectin with acute myeloid leukaemia in adults
Source: PubMed Central journal article supplement (PMC7324623; doi:10.1038/s41598-020-67516-2), 2020-06-29
Supplement: 41598_2020_67516_MOESM1_ESM.pdf [file 41598_2020_67516_MOESM1_ESM.pdf]

## **Associations of ficolins and mannose-binding lectin with acute myeloid leukaemia in adults**

Anna Sokołowska<sup>1</sup>. Anna S. Świerzko<sup>1</sup>. Gabriela Gajek<sup>1</sup>. Aleksandra Gołos<sup>2</sup>. Mateusz Michalski<sup>1</sup>. Mateusz Nowicki<sup>3</sup>. Agnieszka Szala-Poździej<sup>1</sup>. Anna Wolska-Washer<sup>4</sup>. Olga Brzezińska<sup>5,6</sup>. Agnieszka Wierzbowska<sup>4</sup>. Krzysztof Jamroziak<sup>2</sup>. Marek L. Kowalski<sup>5</sup>. Steffen Thiel<sup>7</sup>. Misao Matsushita<sup>8</sup>. Jens C. Jensenius<sup>7</sup>. Maciej Cedzyński<sup>1\*</sup>

<sup>1</sup>Laboratory of Immunobiology of Infections. Institute of Medical Biology. Polish Academy of Sciences. Lodowa 106. 93-232 Łódź. Poland; <sup>2</sup>Department of Hematology. Institute of Hematology and Transfusion Medicine, I. Gandhi 14. 02-776. Warsaw. Poland; <sup>3</sup>Department of Hematology. Copernicus Memorial Hospital in Łódź Comprehensive Cancer Center and Traumatology. Pabianicka 62. 93-513 Łódź. Poland ; <sup>4</sup>Department of Hematology. Medical University of Łódź. Ciołkowskiego 2. 93-510 Łódź. Poland; <sup>5</sup>Department of Immunology and Allergy. Medical University of Łódź. Pomorska 251. 92-213 Łódź. Poland; <sup>6</sup>Department of Rheumatology. Medical University of Łódź. Pieniny 30. 92-003 Łódź. Poland; <sup>7</sup>Department of Biomedicine. Aarhus University. Høegh-Guldbergs Gade 10. 8000 Aarhus C. Denmark; <sup>8</sup>Department of Applied Biochemistry. Tokai University. 4-1-1 Kitakaname. Hiratsuka. Kanagawa 259-1292. Japan

\* - corresponding author (mcedzynski@cbm.pan.pl)

**Supplementary Table 1.** Estimated frequency of reconstructed *FCN1* haplotypes (with EM maximum likelihood method) in patients and controls. C: controls; AML-A: patients who experienced infections with proven bacteremia and/or fungaemia; AML-B: patients who experienced infections with no bacteremia; AML-C: patients who experienced febrile neutropenia; AML-D: patients who experienced none of afore-mentioned complications within 4 weeks of hospital stay. Single nucleotide polymorphisms: -542 G>A, -144 C>A and +6658 G>A were used for reconstruction. *P* values are given when <0.05; results significant after correction for multiple comparisons are displayed in bold.

| Haplotype  | Group |                    |                    |       |        |                    |
|------------|-------|--------------------|--------------------|-------|--------|--------------------|
|            | C     | AML                | AML-A              | AML-B | AML-C* | AML-D              |
| <b>GCG</b> | 0.593 | 0.554              | 0.436 <sup>2</sup> | 0.581 | 0.417  | 0.639              |
| <b>AAG</b> | 0.357 | 0.251 <sup>1</sup> | 0.302              | 0.293 | 0.417  | 0.188 <sup>3</sup> |
| <b>ACG</b> | 0.028 | 0.080 <sup>4</sup> | 0.076 <sup>5</sup> | 0.063 | 0      | 0.106 <sup>6</sup> |
| <b>GAG</b> | 0.020 | 0.112 <sup>7</sup> | 0.186 <sup>8</sup> | 0.055 | 0.167  | 0.067 <sup>9</sup> |
| <b>AAA</b> | 0.002 | 0                  | 0                  | 0     | 0      | 0                  |
| <b>GCA</b> | 0     | 0.003              | 0                  | 0.008 | 0      | 0                  |

<sup>1</sup> – **p=0.0018, OR=0.61, 95% CI (0.44-0.83) vs. C**

<sup>2</sup> – **p=0.0094, OR=0.54, 95% CI (0.34-0.86) vs. C; p=0.0077, OR=0.45, 95% CI (0.25-0.81) vs. AML-D**

<sup>3</sup> – **p=0.0011, OR=0.41, 95% CI (0.24-0.7) vs. C**

<sup>4</sup> – **p=0.001, OR=3.09, 95% CI (1.58-6.04) vs. C**

<sup>5</sup> – **p=0.039, OR=2.82, 95% CI (1.05-7.56) vs. C**

<sup>6</sup> – **p=0.0005, OR=4.32, 95% CI (1.9-9.81) vs. C**

<sup>7</sup> – **p<0.0001, OR=6.32, 95% CI (3.08-12.96) vs. C**

<sup>8</sup> – **p<0.0001, OR=11.28, 95% CI (4.87-26.13) vs. C; p=0.0048, OR=4.18, 95% CI (1.55-1.29) vs. AML-B; p=0.022, OR=3.04, 95% CI (1.18-7.86) vs. AML-D**

<sup>9</sup> – **p=0.0094 OR=3.71, 95% CI (1.38-10) vs. C**

\* - AML-C group was not used for statistical analysis due to low number of patients in whom full genotypes were established (n=6)

**Supplementary Table 2.** Estimated frequency of reconstructed *FCN2* haplotypes (with EM maximum likelihood method) in patients and controls. C: controls; AML-A: patients who experienced infections with proven bacteremia and/or fungaemia; AML-B: patients who experienced infections with no bacteremia; AML-C: patients who experienced febrile neutropenia; AML-D: patients who experienced none of afore-mentioned complications within 4 weeks of hospital stay. Single nucleotide polymorphisms: -64 A>C, -4 A>G, +6359 C>T and +6424 G>T were used for reconstruction.

| Haplotype   | Group  |       |       |       |        |                    |
|-------------|--------|-------|-------|-------|--------|--------------------|
|             | C      | AML   | AML-A | AML-B | AML-C* | AML-D              |
| <b>AACG</b> | 0.461  | 0.513 | 0.458 | 0.515 | 0.583  | 0.580 <sup>1</sup> |
| <b>AGTG</b> | 0.311  | 0.295 | 0.339 | 0.313 | 0      | 0.254              |
| <b>CACG</b> | 0.055  | 0.013 | 0.039 | 0     | 0      | 0                  |
| <b>CACT</b> | 0.044  | 0.078 | 0.066 | 0.044 | 0.083  | 0.092              |
| <b>AACT</b> | 0.032  | 0.007 | 0     | 0.017 | 0.083  | 0                  |
| <b>AATG</b> | 0.035  | 0.045 | 0.056 | 0.046 | 0      | 0.032              |
| <b>AATT</b> | 0.004  | 0     | 0     | 0     | 0      | 0                  |
| <b>AGTT</b> | 0.030  | 0.003 | 0     | 0     | 0      | 0                  |
| <b>AGCG</b> | 0.020  | 0.040 | 0.042 | 0.038 | 0      | 0.042              |
| <b>CGTG</b> | 0.005  | 0     | 0     | 0.009 | 0      | 0                  |
| <b>CGCT</b> | <0.001 | 0.005 | 0     | 0.017 | 0      | 0                  |
| <b>CATT</b> | 0.003  | 0     | 0     | 0     | 0.083  | 0                  |
| <b>CGTT</b> | 0      | 0     | 0     | 0     | 0.167  | 0                  |

<sup>1</sup> – p=0.0291, OR=1.63, 95% CI (1.05-2.52) vs. C

\* - AML-C group was not used for statistical analysis due to low number of patients in whom full genotypes were established (n=6)

**Supplementary Table 3.** Frequency of *MBL2* genotypes in patients (AML) and controls (C). Percentages are shown in parentheses

|                   | Genotype       | Group     |             |
|-------------------|----------------|-----------|-------------|
|                   |                | C (n=256) | AML (n=153) |
| <b>A/A</b>        | <i>HYA/HYA</i> | 36 (14.1) | 15 (9.8)    |
|                   | <i>HYA/LYA</i> | 50 (19.5) | 26 (17)     |
|                   | <i>HYA/LXA</i> | 34 (13.3) | 28 (18.3)   |
|                   | <i>LYA/LYA</i> | 21 (8.2)  | 9 (5.9)     |
|                   | <i>LYA/LXA</i> | 24 (9.4)  | 14 (9.2)    |
|                   | <i>LXA/LXA</i> | 14 (5.5)  | 6 (3.9)     |
| <b>YA/O</b>       | <i>HYA/HYD</i> | 5 (2)     | 3 (2)       |
|                   | <i>HYA/LYD</i> | 1 (0.4)   | 0           |
|                   | <i>HYA/LYB</i> | 29 (11.3) | 8 (5.2)     |
|                   | <i>HYA/LYC</i> | 2 (0.8)   | 0           |
|                   | <i>LYA/HYD</i> | 3 (1.2)   | 3 (2)       |
|                   | <i>LYA/LYB</i> | 10 (3.9)  | 11 (7.2)    |
|                   | <i>LYA/LYC</i> | 1 (0.4)   | 1 (0.7)     |
|                   | <i>LYA/LYD</i> | 1 (0.4)   | 2 (1.3)     |
| <b>XA/O + O/O</b> | <i>LXA/HYD</i> | 6 (2.3)   | 6 (3.9)     |
|                   | <i>LXA/LYB</i> | 13 (5.1)  | 8 (5.2)     |
|                   | <i>LXA/LYC</i> | 0         | 3 (2)       |
|                   | <i>LXA/LYD</i> | 1 (0.4)   | 0           |
|                   | <i>LYB/HYD</i> | 0         | 3 (2)       |
|                   | <i>LYB/LYB</i> | 4 (1.6)   | 4 (2.6)     |
|                   | <i>LYB/LYC</i> | 1 (0.4)   | 2 (1.3)     |
|                   | <i>LYB/LYD</i> | 0         | 1 (0.7)     |

**Supplementary Table 4.** Frequency of *MBL2* haplotypes in patients and controls. C: controls; AML-A: patients who experienced infections with proven bacteremia and/or fungaemia; AML-B: patients who experienced infections with no bacteremia; AML-C: patients who experienced febrile neutropenia; AML-D: patients who experienced none of aforementioned complications within 4 weeks of hospital stay.

| Haplotype  | Group |       |       |       |        |                    |
|------------|-------|-------|-------|-------|--------|--------------------|
|            | C     | AML   | AML-A | AML-B | AML-C* | AML-D              |
| <i>HYA</i> | 0.377 | 0.314 | 0.333 | 0.362 | 0.100  | 0.265 <sup>1</sup> |
| <i>LYA</i> | 0.256 | 0.248 | 0.256 | 0.241 | 0.400  | 0.235              |
| <i>LXA</i> | 0.207 | 0.234 | 0.269 | 0.190 | 0.200  | 0.255              |
| <i>HYD</i> | 0.027 | 0.050 | 0.013 | 0.043 | 0.100  | 0.059              |
| <i>LYD</i> | 0.006 | 0.010 | 0     | 0.017 | 0.100  | 0.010              |
| <i>LYB</i> | 0.119 | 0.135 | 0.128 | 0.129 | 0      | 0.167              |
| <i>LYC</i> | 0.008 | 0.020 | 0     | 0.017 | 0.100  | 0.010              |

<sup>1</sup> – p=0.032, OR=0.6, 95% CI (0.37-0.96) vs. C

\* - AML-C group was not used for statistical analysis due to low number of patients in whom full genotypes were established (n=6)

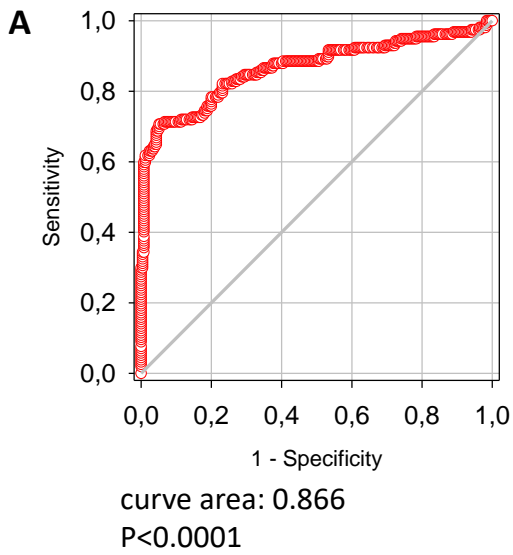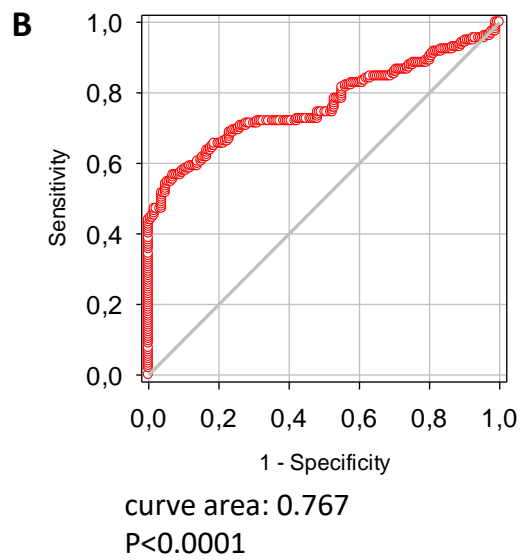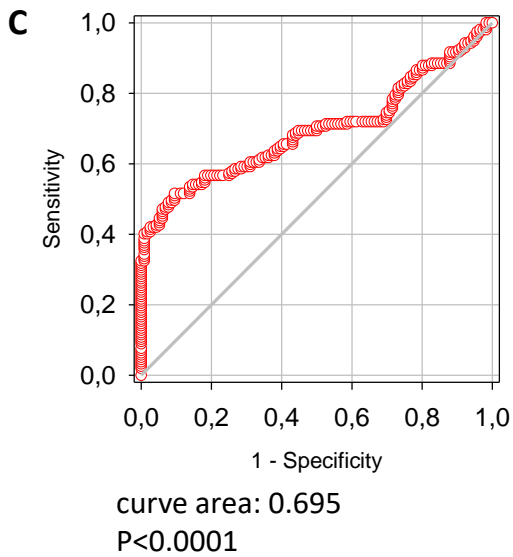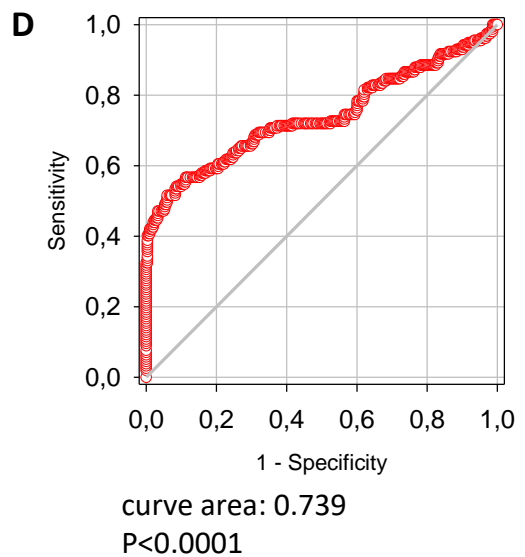

**Supplementary Figure 1.** Differentiation (ROC analysis) between patients suffering from acute myeloid leukaemia and healthy controls (A), multiple myeloma (B), lymphoma (C) and multiple myeloma plus lymphoma patients (D), using determination of ficolin-1 serum concentration.

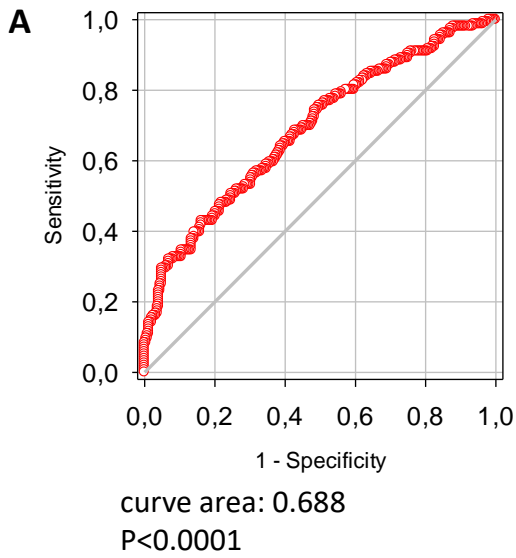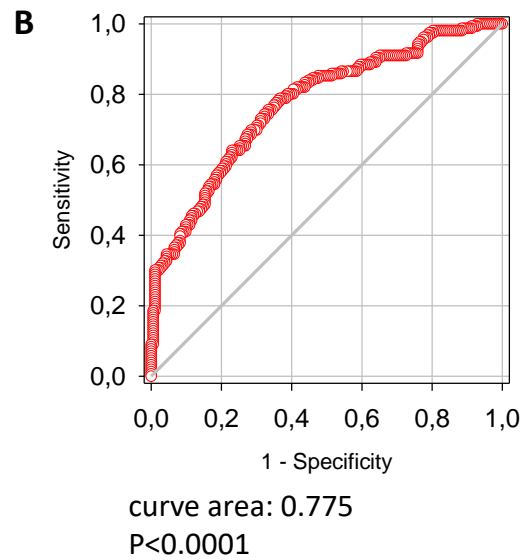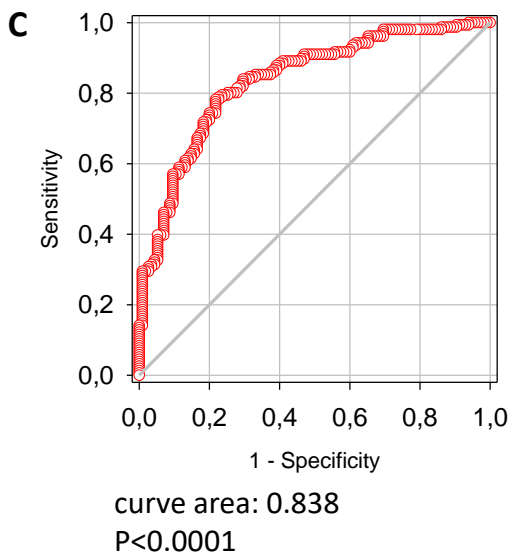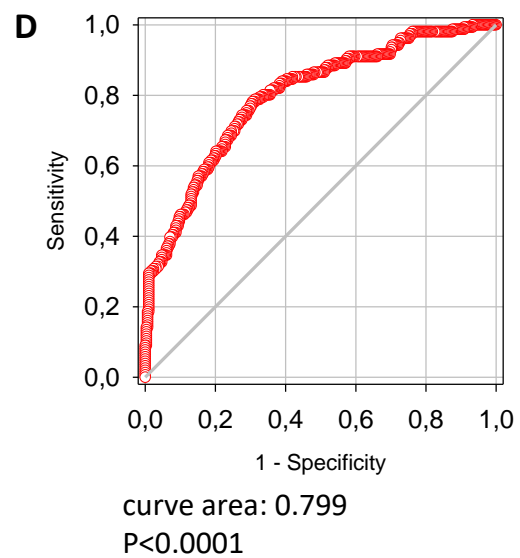

**Supplementary Figure 2.** Differentiation (ROC analysis) between patients suffering from acute myeloid leukaemia and healthy controls (A), multiple myeloma (B), lymphoma (C) and multiple myeloma plus lymphoma patients (D), using determination of ficolin-2 serum concentration.

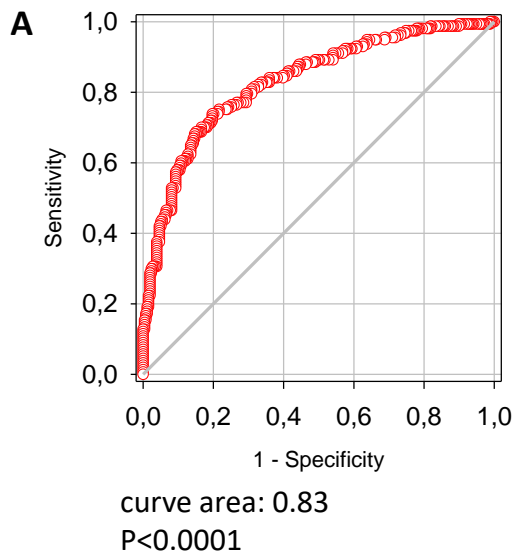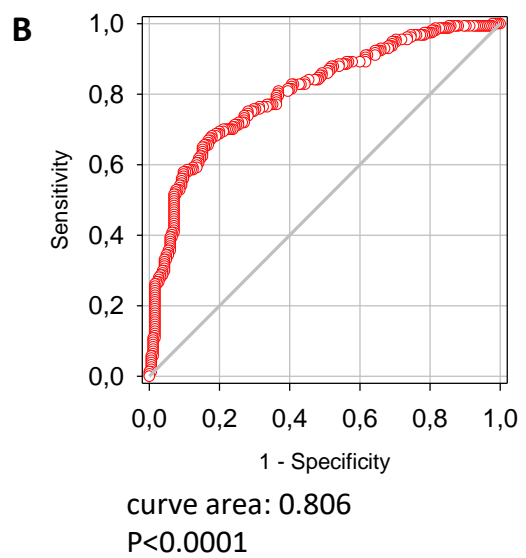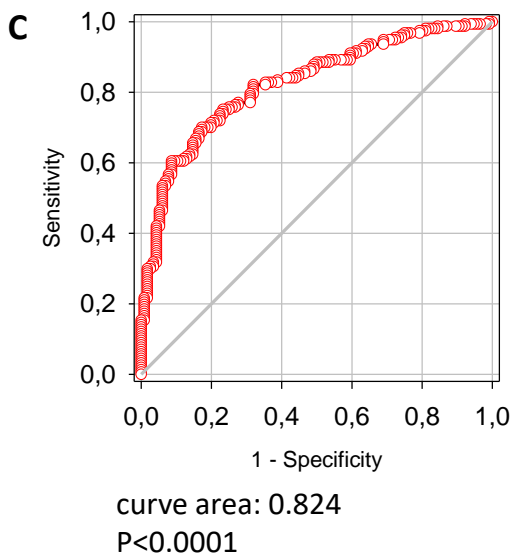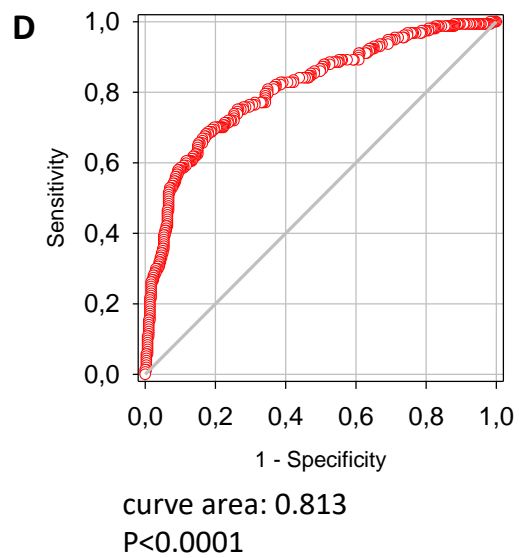

**Supplementary Figure 3.** Differentiation (ROC analysis) between patients suffering from acute myeloid leukaemia and healthy controls (A), multiple myeloma (B), lymphoma (C) and multiple myeloma plus lymphoma patients (D), using determination of ficolin-3 serum concentration.



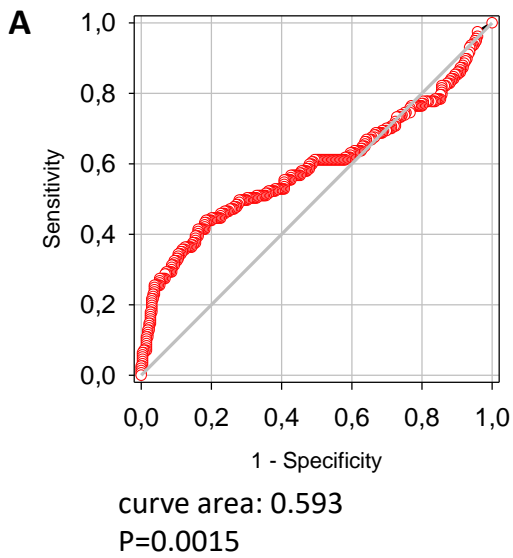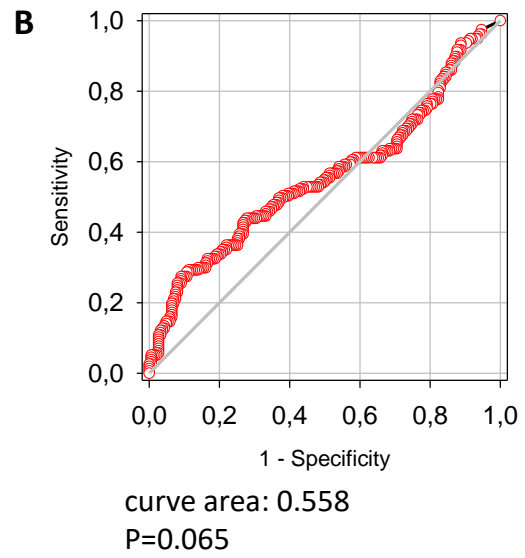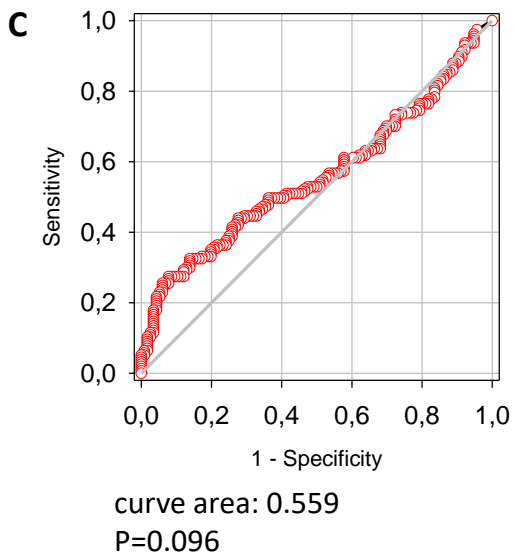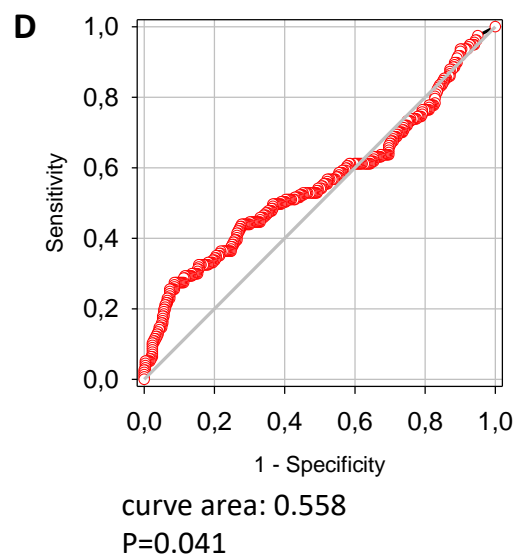

**Supplementary Figure 4.** Differentiation (ROC analysis) between patients suffering from acute myeloid leukaemia and healthy controls (A), multiple myeloma (B), lymphoma (C) and multiple myeloma plus lymphoma patients (D), using determination of mannose-binding lectin serum concentration.
